# Supplementary material
Source: PubMed Central journal article supplement (PMC8083968)
Supplement: NIHMS1688536-supplement-Centers_and_IRBs.pdf [file NIHMS1688536-supplement-Centers_and_IRBs.pdf]

| <b>Clinical Center</b>                                       | <b>Institution Title</b>                                                                               | <b>Protocol Number</b> |
|--------------------------------------------------------------|--------------------------------------------------------------------------------------------------------|------------------------|
| National Jewish Health                                       | National Jewish IRB                                                                                    | HS-1883a               |
| Brigham and Women's Hospital<br>Baylor College of Medicine   | Partners Human Research Committee                                                                      | 2007-P-000554/2; BWH   |
| Michael E. DeBakey VAMC                                      | Institutional Review Board for Baylor<br>College of Medicine and Affiliated Hospitals                  | H-22209                |
| Columbia University Medical Center                           | Institutional Review Board for Baylor College of Medicine and<br>Affiliated Hospitals                  | H-22202                |
| Duke University Medical Center                               | Columbia University Medical Center IRB                                                                 | IRB-AAAC9324           |
| Johns Hopkins University                                     | The Duke University Health System Institutional Review Board<br>for Clinical Investigations (DUHS IRB) | Pro00004464            |
| Los Angeles Biomedical Research<br>Institute                 | Johns Hopkins Medicine Institutional Review Boards (JHM<br>IRB)                                        | NA_00011524            |
| Morehouse School of Medicine                                 | The John F. Wolf, MD Human Subjects Committee of Harbor-<br>UCLA Medical Center                        | 12756-01               |
| Temple University                                            | Morehouse School of Medicine Institutional Review Board                                                | 07-1029                |
| University of Alabama at<br>Birmingham                       | Temple University Office for Human Subjects Protections<br>Institutional Review Board                  | 11369                  |
| University of California, San Diego                          | The University of Alabama at Birmingham Institutional Review<br>Board for Human Use                    | FO70712014             |
| University of Iowa                                           | University of California, San Diego Human Research<br>Protections Program                              | 070876                 |
| Ann Arbor VA                                                 | The University of Iowa Human Subjects Office                                                           | 200710717              |
| University of Minnesota                                      | VA Ann Arbor Healthcare System IRB                                                                     | PCC 2008-110732        |
| University of Pittsburgh                                     | University of Minnesota Research Subjects' Protection<br>Programs (RSPP)                               | 0801M24949             |
| University of Texas Health Sciences<br>Center at San Antonio | University of Pittsburgh Institutional Review Board                                                    | PRO07120059            |
| Health Partners Research<br>Foundation                       | UT Health Science Center San Antonio Institutional Review<br>Board                                     | HSC20070644H           |
| University of Michigan                                       | Health Partners Research Foundation Institutional Review<br>Board                                      | 07-127                 |
| Minneapolis VA Medical Center                                | Medical School Institutional Review Board (IRBMED)                                                     | HUM00014973            |
|                                                              | Minneapolis VAMC IRB                                                                                   | 4128-A                 |

|               |                                                                                                                                  |      |
|---------------|----------------------------------------------------------------------------------------------------------------------------------|------|
| Fallon Clinic | Institutional Review Board/Research Review Committee<br>Saint Vincent Hospital – Fallon Clinic – Fallon Community<br>Health Plan | 1143 |
|---------------|----------------------------------------------------------------------------------------------------------------------------------|------|
